# Supplementary material for: Influenza Viruses Suitable for Studies in Syrian Hamsters
Source: MDPI journal article supplement (doi:10.3390/v14081629), 2022-07-26
Supplement: s1 [file s1]

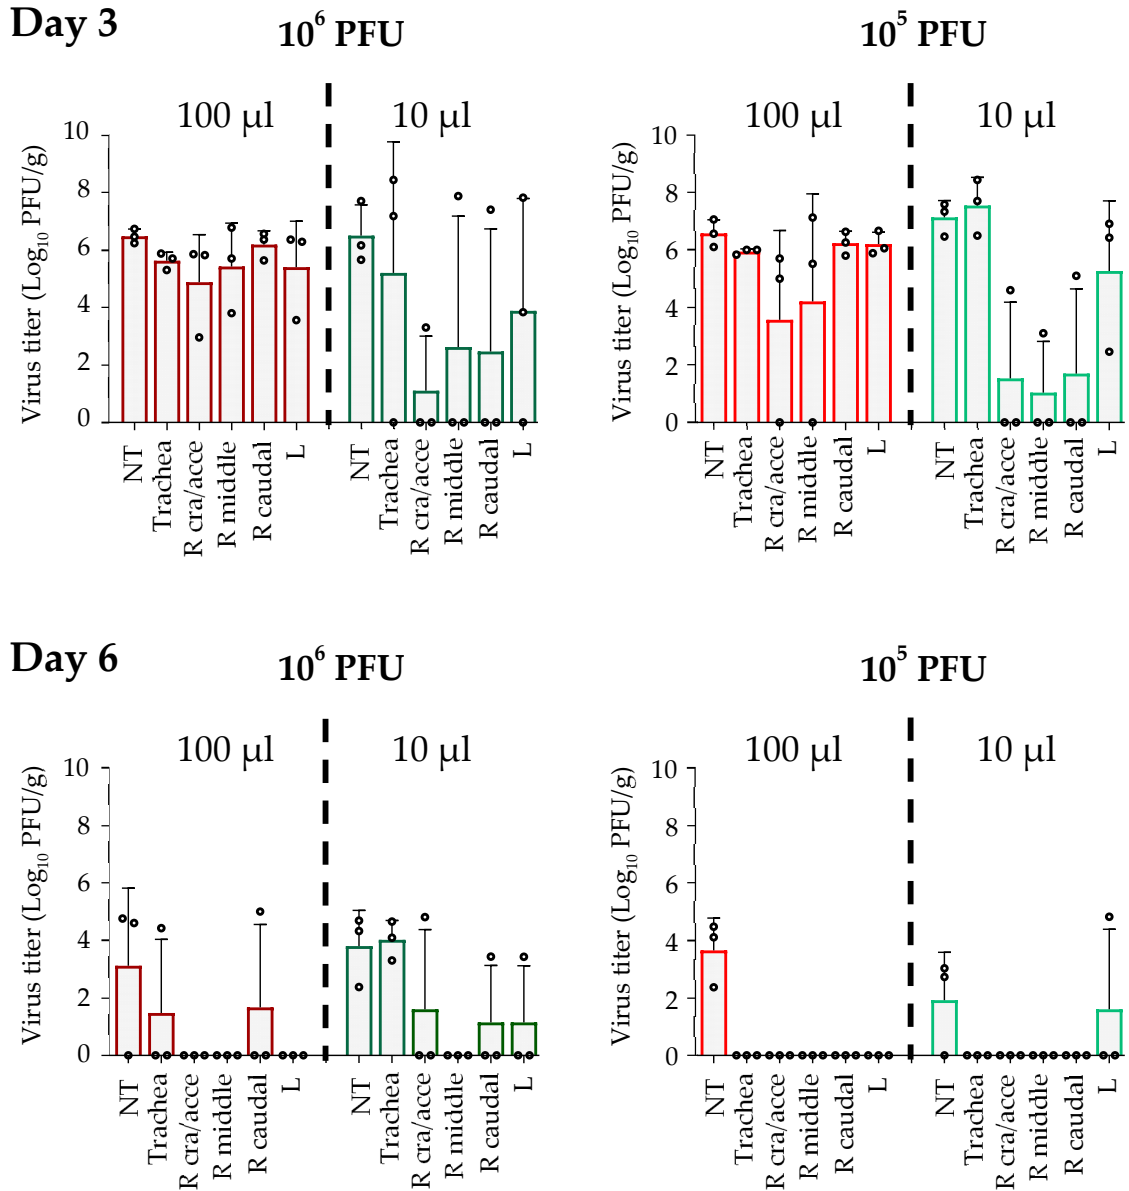

**Figure S1.** Virus replication in hamsters intranasally infected with two different dosages and volumes of influenza virus. Hamsters were intranasally infected with an infectious dosage of  $10^6$  or  $10^5$  PFU of A/Isumi/UT-KK001-1/2018 (pdmH1N1) virus in a volume of 100  $\mu$ l or 10  $\mu$ l. Lung and nasal turbinate samples were collected for virus titration on day 3 and day 6 post-infection. NT, nasal turbinate; R cra/acce, right cranial and accessory lobes; R middle, right middle lobe; R caudal, right caudal lobe; L, left lobe.
